# Supplementary material for: Reciproc vs. hand instrumentation in dental practice: a study in routine care
Source: PeerJ. 2016 Jun 28;4:e2182. doi: 10.7717/peerj.2182 (PMC4928463; doi:10.7717/peerj.2182)
Supplement: Data S1 [file peerj-04-2182-s001.xlsx]

## Sheet: Dataforpublication1
StudyID	PractitionerInvestigator	Sex	Birthyear	Ageattreatment	Treatmentgroup1manual2Reciproc	PainbeforeTreatmentVAS100	OHIPG14beforetreatment	PainbeforecompletionoftreatmentVAS100	OHIPG14beforecompletionoftreatment	Zahn	generalphysicalstrainduringtreatment	strainonfingers	preparationwithoutglidepath	Patientwasrelaxed	Anesthesiawassufficientydeep	durationstressedthepatien	mouthopeningstressedthepatien	OHIP_difference	VAS_difference	Noofappointments	Single(1)vsmultiple(2)visits
1	NB	male	1933	79	Reciproc	65	13	5	1	26	true	not true	true	completely true	6	not true at all	neutral	12	60	2	2
2	NB	male	1956	56	manual Preparation	40	3	25	10	38	not true	not true at all	not true	neutral	6	neutral	not true	-7	15	3	2
3	NB	male	1941	71	Reciproc	35	7	50	4	25	neutral	not true at all	true	completely true	6	neutral	not true at all	3	-15	3	2
4	NB	female	1953	59	Reciproc	5	0	0	0	27	true	neutral	not true	neutral	completely true	true	completely true	0	5	3	2
5	NB	female	1963	49	Reciproc	50	19	10	5	24	true	true	not true	true	6	not true at all	not true at all	14	40	3	2
6	NB	male	1940	72	manual Preparation	55	7	5	0	33	neutral	neutral	true	not true at all	6	not true at all	not true at all	7	50	3	2
7	NB	male	1951	61	Reciproc	50	13	0	1	15	not true at all	not true at all	true	completely true	neutral	not true	true	12	50	3	2
8	NB	male	1951	61	Reciproc	100	24	50	4	23	not true at all	not true at all	true	completely true	completely true	not true at all	true	20	50	3	2
9	NB	male	1961	51	manual Preparation	55	17	10	7	35	not true at all	not true at all	true	neutral	completely true	not true at all	not true at all	10	45	3	2
10	NB	male	1959	53	manual Preparation	10	6	0	0	16	true	true	not true	not true	6	not true	neutral	6	10	3	2
11	NB	male	1987	25	manual Preparation	0	0	0	0	12	not true at all	not true at all	true	true	6	not true at all	not true at all	0	0	2	2
12	NB	male	1940	72	Reciproc	50	0	0	0	46	completely true	completely true	not true	completely true	6	neutral	true	0	50	3	2
13	NB	female	1943	69	Reciproc	5	0	0	0	21	true	neutral	not true	completely true	completely true	not true at all	completely true	0	5	3	2
14	NB	male	1973	39	manual Preparation	60	19	0	4	36	completely true	completely true	not true	not true at all	not true	not true at all	not true at all	15	60	3	2
15	NB	male	1957	55	Reciproc	65	13	20	2	46	true	not true at all	true	completely true	completely true	not true at all	not true at all	11	45	3	2
16	NB	male	1987	25	manual Preparation	5	4	45	18	25	true	true	not true	not true	6	not true	not true	-14	-40	3	2
17	NB	male	1987	25	manual Preparation	5	2	5	1	17	true	not true	true	completely true	completely true	not true	not true at all	1	0	3	2
18	NB	female	1940	72	manual Preparation	85	30	35	8	45	neutral	neutral	not true	completely true	6	not true at all	completely true	22	50	3	2
19	NB	male	1972	40	Reciproc	#NULL!	#NULL!	#NULL!	#NULL!	27	not true	not true	true	completely true	completely true	not true at all	not true	#NULL!	#NULL!	3	2
20	NB	female	1961	51	Reciproc	45	18	0	0	36	completely true	neutral	true	true	completely true	not true at all	neutral	18	45	3	2
21	NB	female	1976	36	Reciproc	0	0	0	0	22	not true at all	not true at all	true	not true	6	not true at all	not true at all	0	0	3	2
22	AR	male	1935	77	manual Preparation	25	7	5	0	34	true	true	not true	true	completely true	completely true	completely true	7	20	2	2
23	AR	male	1941	71	manual Preparation	70	0	0	0	23	neutral	true	true	completely true	completely true	not true at all	not true at all	0	70	3	2
24	AR	male	1940	72	manual Preparation	10	3	5	0	24	neutral	not true	true	not true at all	true	not true at all	true	3	5	3	2
25	AR	male	1955	57	Reciproc	20	2	0	0	14	true	neutral	true	completely true	6	not true at all	not true at all	2	20	3	2
26	AR	male	1941	71	manual Preparation	5	0	0	0	37	completely true	completely true	true	completely true	completely true	neutral	neutral	0	5	3	2
27	AR	male	1955	57	manual Preparation	65	27	0	0	15	completely true	true	not true	completely true	completely true	not true at all	not true at all	27	65	3	2
28	AR	female	1986	26	Reciproc	30	4	0	0	21	not true at all	not true at all	true	neutral	6	not true at all	not true at all	4	30	3	2
29	AR	female	1986	26	Reciproc	30	4	0	0	22	not true at all	not true at all	true	neutral	completely true	not true at all	not true at all	4	30	3	2
30	AR	female	1951	61	Reciproc	60	6	0	2	22	not true	not true	true	neutral	completely true	not true at all	not true at all	4	60	3	2
31	AR	female	1937	75	manual Preparation	80	21	0	0	15	not true at all	neutral	true	completely true	completely true	not true at all	not true	21	80	3	2
32	AR	male	1935	77	manual Preparation	35	10	0	0	45	neutral	neutral	true	neutral	6	neutral	neutral	10	35	3	2
33	AR	female	1951	61	Reciproc	85	6	5	0	16	completely true	completely true	true	not true	completely true	not true at all	not true at all	6	80	3	2
34	AR	male	1975	37	Reciproc	70	29	0	0	25	true	neutral	not true	neutral	completely true	not true	not true at all	29	70	3	2
35	AR	female	1955	57	Reciproc	15	2	0	0	17	completely true	neutral	true	true	6	not true at all	neutral	2	15	3	2
36	AR	female	1956	56	manual Preparation	20	1	5	1	23	not true at all	not true at all	true	completely true	completely true	not true at all	not true at all	0	15	3	2
37	AR	female	1951	61	manual Preparation	50	9	0	0	36	completely true	completely true	not true	neutral	completely true	true	true	9	50	3	2
38	AR	male	1959	53	Reciproc	35	5	0	0	44	not true	not true	true	completely true	completely true	completely true	completely true	5	35	3	2
39	AR	female	1986	26	manual Preparation	100	34	0	4	27	completely true	completely true	not true	not true at all	true	true	true	30	100	3	2
40	AR	female	1967	45	Reciproc	85	22	#NULL!	#NULL!	26	completely true	completely true	not true	#NULL!	#NULL!	#NULL!	#NULL!	#NULL!	#NULL!	3	2
41	AR	female	1985	27	Reciproc	0	0	0	0	21	neutral	not true	true	not true	6	not true at all	neutral	0	0	3	2
42	AR	female	1974	38	Reciproc	40	11	0	2	14	true	true	true	true	6	not true at all	not true at all	9	40	2	2
43	AR	female	1974	38	Reciproc	30	12	0	1	15	completely true	true	true	true	6	not true at all	not true at all	11	30	3	2
44	IG	female	1946	66	manual Preparation	60	3	0	2	24	neutral	completely true	not true	completely true	completely true	not true at all	not true	1	60	1	1
45	IG	female	1952	60	Reciproc	15	19	15	19	27	not true at all	not true at all	not true	completely true	completely true	not true at all	not true at all	0	0	1	1
46	IG	female	1952	60	manual Preparation	80	22	15	22	35	true	true	not true	completely true	6	not true at all	not true	0	65	1	1
47	IG	female	1933	79	Reciproc	25	4	25	4	27	true	true	not true	completely true	6	not true at all	not true	0	0	1	1
48	IG	female	1933	79	Reciproc	#NULL!	18	#NULL!	13	46	not true at all	not true at all	true	not true at all	completely true	not true at all	not true	5	#NULL!	1	1
49	IG	female	1941	71	manual Preparation	85	10	5	0	33	not true at all	not true at all	not true	neutral	true	not true	not true at all	10	80	1	1
50	IG	female	1958	54	Reciproc	30	15	20	10	26	not true at all	not true at all	not true	not true	not true at all	not true at all	neutral	5	10	1	1
51	IG	female	1971	41	manual Preparation	5	1	0	0	25	not true	not true at all	not true	not true at all	true	neutral	not true at all	1	5	1	1
52	IG	male	1969	43	Reciproc	0	7	#NULL!	0	16	not true at all	not true at all	true	completely true	6	not true at all	not true	7	#NULL!	1	1
53	IG	male	1965	47	manual Preparation	50	3	50	4	44	neutral	neutral	not true	completely true	completely true	not true at all	not true at all	-1	0	1	1
54	IG	male	1967	45	Reciproc	0	0	0	0	36	neutral	not true at all	true	completely true	not true	neutral	completely true	0	0	1	1
55	IG	male	1946	66	manual Preparation	#NULL!	1	5	3	44	neutral	neutral	not true	completely true	6	not true at all	not true at all	-2	#NULL!	2	2
56	IG	male	1951	61	manual Preparation	90	15	50	0	46	neutral	completely true	not true	completely true	completely true	not true at all	not true	15	40	1	1
57	IG	female	1938	74	manual Preparation	50	0	0	1	35	not true	true	not true	completely true	6	not true at all	neutral	-1	50	1	1
58	IG	female	1982	30	manual Preparation	50	8	50	4	15	neutral	not true at all	not true	completely true	completely true	not true at all	not true at all	4	0	1	1
59	IG	male	1967	45	manual Preparation	20	1	0	1	15	true	true	not true	completely true	completely true	not true	not true	0	20	1	1
60	IG	male	1947	65	manual Preparation	70	11	5	6	43	neutral	neutral	true	completely true	completely true	not true at all	not true	5	65	1	1
61	IG	male	1981	31	manual Preparation	80	3	0	0	37	true	true	not true	neutral	completely true	not true	neutral	3	80	1	1
62	IG	male	1939	73	manual Preparation	65	10	5	13	34	neutral	not true	not true	completely true	completely true	not true	not true	-3	60	1	1
63	IG	female	1981	31	manual Preparation	80	32	20	6	27	neutral	neutral	not true	true	true	neutral	true	26	60	1	1
64	IG	female	1960	52	Reciproc	80	14	10	4	26	not true	not true at all	true	completely true	6	not true at all	not true at all	10	70	1	1
65	IG	female	1942	70	Reciproc	40	3	30	3	16	not true at all	not true at all	true	completely true	completely true	true	true	0	10	1	1
66	IG	male	1941	71	manual Preparation	25	0	25	1	34	not true	not true at all	not true	true	completely true	neutral	true	-1	0	1	1
67	IG	male	1941	71	manual Preparation	35	6	15	1	35	not true	not true	true	true	neutral	not true	not true at all	5	20	2	2
68	IG	male	1960	52	manual Preparation	40	17	0	0	44	neutral	not true	true	completely true	completely true	not true at all	not true	17	40	1	1
69	IG	male	1975	37	manual Preparation	90	31	#NULL!	#NULL!	31	neutral	not true at all	not true	999	999	999	999	#NULL!	#NULL!	1	1
70	IG	female	1947	65	Reciproc	50	24	20	11	26	not true at all	not true at all	true	completely true	not true at all	not true at all	not true at all	13	30	1	1
71	IG	female	1947	65	manual Preparation	80	29	10	0	45	not true at all	not true	not true	completely true	6	not true at all	not true	29	70	1	1
72	IG	female	1947	65	Reciproc	60	12	#NULL!	0	27	not true at all	not true at all	true	not true at all	completely true	not true at all	not true at all	12	#NULL!	1	1
73	IG	#NULL!	#NULL!	#NULL!	Reciproc	#NULL!	#NULL!	#NULL!	#NULL!	46	not true at all	not true at all	true	completely true	6	not true at all	not true at all	#NULL!	#NULL!	1	1
74	IG	male	1975	37	Reciproc	70	21	10	1	26	not true at all	not true at all	true	completely true	completely true	not true at all	neutral	20	60	2	2
75	IG	#NULL!	#NULL!	#NULL!	Reciproc	#NULL!	#NULL!	#NULL!	#NULL!	47	neutral	not true at all	true	true	not true at all	not true	neutral	#NULL!	#NULL!	1	1
76	IG	male	1991	21	manual Preparation	25	0	10	0	25	not true at all	neutral	true	completely true	6	not true	not true	0	15	1	1
77	IG	female	1939	73	Reciproc	50	9	50	9	17	true	not true at all	not true	not true at all	completely true	not true at all	not true at all	0	0	1	1
78	KB	female	1948	64	manual Preparation	70	2	0	2	24	not true	neutral	true	true	true	true	true	0	70	2	2
79	KB	male	1956	56	Reciproc	70	31	20	4	16	not true	not true	not true	true	completely true	neutral	true	27	50	1	1
80	KB	male	1956	56	Reciproc	70	31	20	4	27	completely true	completely true	not true	true	completely true	true	neutral	27	50	1	1
81	KB	female	1942	70	Reciproc	75	31	55	21	21	not true at all	not true at all	not true	neutral	completely true	true	not true	10	20	1	1
82	KB	male	1937	75	Reciproc	85	20	85	20	46	not true at all	not true at all	not true	not true at all	completely true	neutral	neutral	0	0	1	1
83	KB	female	1964	48	Reciproc	70	40	30	29	37	true	true	true	neutral	true	not true	not true	11	40	1	1
84	KB	male	1958	54	manual Preparation	50	9	80	20	27	neutral	true	not true	true	completely true	not true at all	not true	-11	-30	1	1
85	KB	male	1958	54	manual Preparation	50	11	5	1	25	not true at all	not true	not true	completely true	completely true	not true at all	not true at all	10	45	1	1
86	KB	female	1960	52	Reciproc	85	30	5	17	36	neutral	not true	not true	not true	not true	true	not true	13	80	1	1
87	KB	male	1954	58	Reciproc	55	7	55	5	27	not true	not true	not true	completely true	completely true	not true	not true	2	0	1	1
88	KB	male	1952	60	manual Preparation	5	0	5	0	14	neutral	true	not true	not true	completely true	true	true	0	0	1	1
89	KB	male	1952	60	manual Preparation	5	0	5	0	13	not true at all	neutral	not true	completely true	completely true	true	true	0	0	1	1
90	KB	male	1933	79	Reciproc	0	0	0	0	23	not true at all	not true at all	true	completely true	completely true	not true at all	not true at all	0	0	1	1
91	KB	female	1961	51	manual Preparation	65	11	5	1	22	not true at all	not true	not true	true	true	neutral	neutral	10	60	1	1
92	KB	female	1965	47	manual Preparation	0	0	10	0	15	neutral	neutral	not true	neutral	completely true	true	neutral	0	-10	1	1
93	KB	female	1965	47	manual Preparation	#NULL!	0	0	0	36	not true	neutral	not true	not true	completely true	not true	not true	0	#NULL!	1	1
94	KB	female	1977	35	Reciproc	80	23	5	2	46	not true	not true	not true	not true	completely true	not true	not true	21	75	1	1
95	NA	male	1966	46	Reciproc	40	4	0	0	27	not true	not true at all	true	completely true	completely true	not true at all	not true at all	4	40	1	1
96	NA	male	1942	70	Reciproc	20	0	0	0	47	not true at all	not true	true	completely true	completely true	not true at all	not true at all	0	20	1	1
97	NA	male	1932	80	manual Preparation	0	6	0	0	45	not true	not true at all	not true	true	completely true	not true at all	not true at all	6	0	2	2
98	NA	female	1992	20	manual Preparation	80	15	#NULL!	#NULL!	25	neutral	neutral	not true	neutral	completely true	neutral	not true at all	#NULL!	#NULL!	1	1
99	NA	female	1933	79	Reciproc	40	6	0	0	21	not true at all	not true at all	true	completely true	completely true	not true at all	not true at all	6	40	1	1
100	NA	male	1974	38	manual Preparation	0	0	30	8	16	true	neutral	not true	true	completely true	neutral	neutral	-8	-30	1	1
101	NA	female	1990	22	manual Preparation	30	5	0	0	26	not true	neutral	not true	completely true	completely true	not true at all	not true at all	5	30	1	1
102	NA	female	1963	49	manual Preparation	60	7	0	0	36	neutral	completely true	not true	completely true	completely true	not true at all	not true at all	7	60	2	2
103	NA	male	1996	16	Reciproc	40	8	0	0	16	not true at all	not true at all	true	completely true	completely true	not true at all	not true at all	8	40	1	1
104	NA	female	1963	49	manual Preparation	50	8	0	8	47	completely true	completely true	not true	true	completely true	true	not true at all	0	50	2	2
105	NA	male	1968	44	Reciproc	70	4	0	0	46	not true	not true at all	true	completely true	completely true	not true at all	not true at all	4	70	1	1
106	NA	male	1986	26	Reciproc	50	4	0	0	17	not true at all	not true at all	not true	completely true	completely true	not true at all	not true at all	4	50	1	1
107	NA	male	1986	26	Reciproc	40	4	20	3	14	not true at all	not true at all	true	completely true	completely true	not true at all	not true at all	1	20	1	1
108	NA	female	1939	73	Reciproc	30	3	0	5	17	not true	not true	true	completely true	completely true	not true	not true	-2	30	2	2
109	NA	female	1965	47	manual Preparation	30	3	0	0	35	neutral	neutral	not true	completely true	completely true	true	not true at all	3	30	1	1
110	NA	male	1960	52	manual Preparation	20	2	0	0	46	not true	not true	not true	completely true	completely true	true	not true at all	2	20	1	1
111	NA	male	1964	48	Reciproc	50	7	0	0	35	not true at all	not true at all	true	completely true	completely true	not true at all	not true at all	7	50	1	1
112	NA	male	1968	44	manual Preparation	40	17	20	12	36	true	true	not true	neutral	completely true	not true at all	not true at all	5	20	1	1
113	NA	male	1959	53	manual Preparation	50	12	0	3	37	true	neutral	not true	true	completely true	not true at all	not true at all	9	50	1	1
114	NA	female	1974	38	Reciproc	40	8	0	0	13	not true at all	not true at all	true	completely true	completely true	not true at all	not true at all	8	40	2	2
115	NA	female	1974	38	Reciproc	70	19	0	0	14	not true at all	not true at all	true	completely true	completely true	not true at all	not true at all	19	70	1	1
116	NA	male	1942	70	Reciproc	40	8	40	8	31	not true at all	not true at all	true	completely true	completely true	not true at all	completely true	0	0	1	1
117	NA	male	1942	70	Reciproc	40	8	40	8	41	not true at all	not true at all	true	completely true	completely true	not true at all	completely true	0	0	2	2
118	NA	male	1990	22	Reciproc	20	7	0	0	27	true	not true at all	not true	true	completely true	true	completely true	7	20	2	2
119	NA	male	1982	30	manual Preparation	0	0	0	4	25	not true	not true	not true	true	completely true	not true at all	not true at all	-4	0	1	1
120	NA	female	1960	52	Reciproc	30	4	0	0	25	not true at all	not true at all	true	completely true	completely true	not true at all	not true at all	4	30	1	1
121	NA	female	1960	52	Reciproc	0	6	0	0	38	not true at all	not true	not true	completely true	completely true	not true at all	not true at all	6	0	1	1
122	NA	male	1965	47	manual Preparation	0	3	0	0	47	true	true	not true	neutral	completely true	not true	not true at all	3	0	1	1
123	NA	female	1968	44	manual Preparation	60	23	40	20	36	true	true	not true	neutral	neutral	neutral	neutral	3	20	1	1
124	NA	male	1985	27	Reciproc	70	7	0	0	16	not true	not true at all	true	completely true	completely true	not true at all	not true at all	7	70	1	1
125	NA	male	1958	54	manual Preparation	20	1	0	0	23	not true at all	not true	not true	completely true	completely true	not true at all	not true at all	1	20	1	1
126	NA	male	1962	50	Reciproc	70	9	0	0	12	not true at all	not true at all	true	completely true	completely true	not true at all	not true at all	9	70	1	1
127	CW	female	1940	72	manual Preparation	70	12	0	3	44	not true	not true	not true	true	6	not true at all	neutral	9	70	1	1
128	CW	male	1956	56	Reciproc	0	1	20	0	27	true	not true	not true	true	#NULL!	neutral	neutral	1	-20	1	1
129	CW	female	1948	64	Reciproc	0	9	0	9	34	not true	not true at all	true	completely true	completely true	not true	not true	0	0	1	1
130	CW	female	1971	41	manual Preparation	100	25	0	2	14	neutral	neutral	not true	not true	6	true	neutral	23	100	2	2
131	CW	male	1965	47	manual Preparation	0	8	0	8	23	not true	not true	not true	completely true	completely true	not true at all	not true at all	0	0	2	2
132	CW	male	1981	31	Reciproc	10	1	10	0	14	neutral	neutral	not true	true	#NULL!	not true at all	not true at all	1	0	1	1
133	CW	male	1981	31	Reciproc	0	0	0	0	25	not true	not true at all	true	completely true	completely true	not true	neutral	0	0	2	2
134	CW	female	1976	36	manual Preparation	80	25	0	6	25	neutral	neutral	not true	true	completely true	true	neutral	19	80	2	2
135	CW	female	1973	39	manual Preparation	0	2	0	0	44	not true	not true	not true	completely true	completely true	completely true	completely true	2	0	2	2
136	CW	female	1973	39	Reciproc	0	0	0	0	45	not true	not true at all	true	completely true	completely true	neutral	neutral	0	0	3	2
137	CW	male	1970	42	Reciproc	10	8	10	0	21	not true at all	not true at all	not true	completely true	completely true	not true at all	not true at all	8	0	2	2
